# Supplementary material for: Structural Disorder of Graphite and Implications for Graphite Thermometry
Source: Copernicus journal article supplement (doi:10.5194/se-2017-74), 2017-07-20
Supplement: Supplementary file 1 [file se-2017-74-supplement.pdf]

| Sample                                             | D1 int   | D1 pos   | D1 width | D1 area  | G int    | G pos    | G width | G area   | D2 int   | D2 pos   | D2 width | D2 area | R2      | T (°C)          |              |
|----------------------------------------------------|----------|----------|----------|----------|----------|----------|---------|----------|----------|----------|----------|---------|---------|-----------------|--------------|
|                                                    |          |          |          |          |          |          |         |          |          |          |          |         |         | 0               |              |
|                                                    | 1351.659 | 13.680   | 35.495   | 638.248  | 1581.305 | 69.715   | 18.550  | 1857.300 | 1621.965 | 5.912    | 11.657   | 88.132  | 0.247   | 531             |              |
|                                                    | 1352.421 | 6.070    | 36.713   | 277.065  | 1580.884 | 37.573   | 16.829  | 911.345  | 1621.935 | 2.412    | 10.963   | 31.067  | 0.227   | 540             |              |
|                                                    | 1354.634 | 5.594    | 39.129   | 293.603  | 1580.742 | 62.540   | 15.834  | 1475.998 | 1622.479 | 9.846    | 8.536    | 95.636  | 0.157   | 571             |              |
|                                                    | 1350.138 | 4.643    | 40.723   | 215.735  | 1576.265 | 71.516   | 14.979  | 1583.251 | 1617.240 | 5.282    | 9.882    | 55.559  | 0.116   | 589             |              |
|                                                    | 1351.934 | 5.187    | 40.270   | 251.352  | 1578.263 | 70.053   | 15.526  | 1610.397 | 1619.514 | 2.177    | 11.746   | 33.354  | 0.133   | 582             |              |
|                                                    | 1352.993 | 3.170    | 39.572   | 180.638  | 1580.483 | 33.593   | 15.350  | 752.141  | 1621.728 | 2.510    | 9.362    | 30.567  | 0.188   | 558             |              |
|                                                    | 1351.501 | 5.445    | 38.712   | 250.292  | 1579.580 | 41.096   | 15.544  | 940.387  | 1620.658 | 2.297    | 10.214   | 28.398  | 0.205   | 550             |              |
| Pre-shear<br>highly crystalline<br>graphite powder | 1349.177 | 16.162   | 39.093   | 811.786  | 1578.225 | 93.347   | 16.540  | 2287.891 | 1618.982 | 5.882    | 12.533   | 79.928  | 0.255   | 527             |              |
|                                                    | 1351.779 | 5.377    | 38.113   | 244.970  | 1579.662 | 31.802   | 15.333  | 714.719  | 1621.408 | 2.923    | 9.096    | 34.249  | 0.246   | 531             |              |
|                                                    | 1344.394 | 6.406    | 40.927   | 360.025  | 1571.595 | 65.336   | 18.414  | 1784.308 | 1608.854 | 1.743    | 21.064   | 39.083  | 0.165   | 568             |              |
|                                                    | 1350.942 | 6.047    | 37.918   | 297.835  | 1577.333 | 59.522   | 15.275  | 1350.865 | 1618.668 | 4.564    | 9.157    | 49.228  | 0.175   | 563             |              |
|                                                    | 1350.973 | 2.944    | 37.263   | 128.905  | 1579.135 | 101.507  | 14.324  | 2161.300 | 1620.734 | 1.395    | 5.608    | 8.328   | 0.056   | 616             |              |
|                                                    | 1352.140 | 11.632   | 38.562   | 535.606  | 1580.221 | 69.701   | 15.236  | 1585.251 | 1621.738 | 6.248    | 8.813    | 74.937  | 0.244   | 532             |              |
|                                                    | 1339.519 | 1.825    | 51.497   | 104.264  | 1562.696 | 43.124   | 17.449  | 1135.353 | 1601.074 | 1.470    | 12.074   | 18.893  | 0.083   | 604             |              |
|                                                    | 1350.976 | 5.016    | 42.778   | 282.264  | 1578.499 | 33.300   | 16.583  | 821.564  | 1619.828 | 3.061    | 10.182   | 34.707  | 0.248   | 531             |              |
|                                                    |          |          |          | 0.000    | 1578.818 | 72.061   | 16.095  | 1653.705 |          |          |          |         | 0.000   | 0.000           | 641          |
|                                                    | 1350.947 | 7.504    | 37.888   | 302.643  | 1578.807 | 83.278   | 18.155  | 2156.869 | 1619.765 | 4.245    | 9.540    | 62.728  | 0.120   | 588             |              |
|                                                    | 1349.000 | 28.661   | 40.083   | 1472.064 | 1578.118 | 106.824  | 17.585  | 2786.704 | 1619.166 | 15.972   | 10.763   | 236.593 | 0.327   | 495             |              |
|                                                    | 1342.384 | 5.279    | 42.306   | 307.347  | 1570.658 | 55.726   | 16.924  | 1420.718 | 1608.766 | 3.888    | 13.356   | 64.755  | 0.171   | 565             |              |
|                                                    | 1344.134 | 4.276    | 41.989   | 246.515  | 1573.146 | 76.048   | 19.894  | 2197.182 |          |          |          |         | 0.101   | 596             |              |
|                                                    |          |          |          |          |          |          |         |          |          |          |          |         |         | <b>Average:</b> | <b>0.173</b> |
|                                                    | 1348.524 | 48.324   | 47.427   | 3307.065 | 1581.918 | 60.724   | 28.779  | 2542.366 | 1615.803 | 15.629   | 26.182   | 435.581 | 0.526   | 407             |              |
|                                                    | 1348.828 | 68.545   | 46.925   | 4658.432 | 1582.971 | 71.533   | 30.837  | 3252.492 | 1616.918 | 20.103   | 24.771   | 530.057 | 0.552   | 395             |              |
|                                                    | 1348.477 | 61.698   | 48.512   | 4363.084 | 1581.800 | 77.698   | 28.968  | 3303.860 | 1615.944 | 20.465   | 26.052   | 567.514 | 0.530   | 405             |              |
|                                                    | 1348.709 | 48.845   | 47.833   | 3422.793 | 1582.210 | 62.274   | 29.243  | 2640.734 | 1616.385 | 16.790   | 25.806   | 461.200 | 0.525   | 408             |              |
|                                                    | 1349.271 | 26.486   | 46.857   | 1803.653 | 1580.977 | 67.998   | 24.822  | 2438.606 | 1615.999 | 8.035    | 27.798   | 237.744 | 0.403   | 462             |              |
|                                                    | 1348.651 | 54.200   | 48.022   | 3786.511 | 1581.519 | 77.042   | 27.757  | 3126.506 | 1615.670 | 17.895   | 27.658   | 526.850 | 0.509   | 415             |              |
|                                                    | 1348.440 | 68.025   | 47.463   | 4820.986 | 1582.507 | 71.653   | 29.489  | 3149.952 | 1616.204 | 20.004   | 25.683   | 546.869 | 0.566   | 389             |              |
|                                                    | 1348.990 | 49.179   | 48.371   | 3561.784 | 1582.418 | 59.806   | 28.508  | 2487.540 | 1616.710 | 15.860   | 25.690   | 433.705 | 0.549   | 397             |              |
|                                                    | 1348.743 | 54.730   | 48.266   | 3850.335 | 1581.489 | 73.780   | 27.423  | 2904.139 | 1615.503 | 17.965   | 26.560   | 507.926 | 0.530   | 405             |              |
| Exp. 1<br>5 MPa, 1 μm/s, 20 mm                     | 1349.158 | 40.436   | 47.266   | 2807.972 | 1581.432 | 66.234   | 27.440  | 2611.879 | 1616.674 | 12.533   | 25.333   | 337.699 | 0.488   | 424             |              |
|                                                    | 1348.843 | 47.768   | 46.851   | 3253.741 | 1581.405 | 74.367   | 26.532  | 2868.785 | 1616.046 | 14.908   | 26.249   | 416.538 | 0.498   | 420             |              |
|                                                    | 1347.862 | 105.578  | 50.070   | 7950.398 | 1584.155 | 85.424   | 34.099  | 4357.258 | 1616.032 | 30.843   | 23.512   | 771.924 | 0.608   | 371             |              |
|                                                    | 1349.304 | 27.955   | 46.914   | 1960.953 | 1580.711 | 74.596   | 22.959  | 2526.085 | 1615.687 | 8.827    | 29.148   | 273.887 | 0.412   | 458             |              |
|                                                    | 1348.880 | 52.831   | 48.002   | 3716.390 | 1581.384 | 73.241   | 27.441  | 2918.920 | 1615.811 | 17.072   | 26.320   | 478.300 | 0.522   | 409             |              |
|                                                    | 1348.688 | 59.153   | 48.076   | 4215.771 | 1581.863 | 76.045   | 27.745  | 3128.364 | 1615.858 | 18.925   | 26.758   | 539.038 | 0.535   | 403             |              |
|                                                    | 1349.379 | 43.965   | 47.453   | 3044.405 | 1581.252 | 75.564   | 24.723  | 2708.903 | 1615.327 | 14.475   | 28.372   | 437.171 | 0.492   | 422             |              |
|                                                    | 1349.338 | 33.948   | 46.504   | 2294.322 | 1581.053 | 74.269   | 24.522  | 2654.988 | 1615.545 | 11.045   | 29.182   | 343.086 | 0.434   | 448             |              |
|                                                    | 1348.894 | 50.724   | 47.874   | 3646.326 | 1581.413 | 77.033   | 26.743  | 3003.598 | 1615.797 | 17.524   | 26.898   | 501.750 | 0.510   | 414             |              |
|                                                    | 1349.660 | 39.703   | 47.377   | 2732.041 | 1581.145 | 74.387   | 24.205  | 2625.484 | 1615.947 | 12.879   | 28.094   | 385.147 | 0.476   | 429             |              |
|                                                    | 1349.235 | 38.182   | 46.442   | 2601.163 | 1580.825 | 73.019   | 24.777  | 2648.067 | 1616.269 | 11.700   | 26.324   | 327.840 | 0.466   | 433             |              |
|                                                    |          |          |          |          |          |          |         |          |          |          |          |         |         | <b>Average:</b> | <b>0.506</b> |
|                                                    |          | 1348.313 | 51.473   | 44.235   | 3126.703 | 1580.753 | 89.436  | 25.664   | 3117.896 | 1616.242 | 16.051   | 23.800  | 406.654 | 0.470           | 432          |
|                                                    |          | 1348.486 | 36.329   | 44.114   | 2166.959 | 1580.109 | 76.799  | 24.363   | 2534.409 | 1614.731 | 10.639   | 25.330  | 286.853 | 0.434           | 448          |
|                                                    | 1348.976 | 54.501   | 44.290   | 3314.059 | 1581.077 | 101.253  | 24.614  | 3467.712 | 1616.076 | 17.201   | 26.250   | 480.639 | 0.456   | 438             |              |
|                                                    | 1349.595 | 32.044   | 43.971   | 1899.606 | 1580.759 | 85.571   | 23.133  | 2734.369 | 1615.709 | 9.628    | 26.540   | 271.995 | 0.387   | 469             |              |
|                                                    | 1349.529 | 35.548   | 43.879   | 2095.240 | 1580.449 | 90.306   | 22.598  | 2828.860 | 1615.341 | 10.206   | 26.728   | 290.363 | 0.402   | 462             |              |
|                                                    | 1349.337 | 28.416   | 44.495   | 1691.787 | 1580.702 | 68.638   | 23.952  | 2256.560 | 1615.113 | 9.719    | 29.079   | 300.843 | 0.398   | 464             |              |
|                                                    | 1348.590 | 36.364   | 46.005   | 2322.618 | 1580.912 | 78.727   | 21.840  | 2448.603 | 1614.515 | 12.208   | 28.738   | 373.441 | 0.451   | 440             |              |
|                                                    | 1348.166 | 43.599   | 45.753   | 2761.450 | 1580.323 | 78.699   | 25.042  | 2738.421 | 1614.884 | 14.353   | 27.474   | 419.744 | 0.466   | 433             |              |
|                                                    | 1348.573 | 49.211   | 46.329   | 3198.885 | 1581.898 | 61.761   | 28.319  | 2373.087 | 1616.496 | 16.624   | 25.402   | 449.500 | 0.531   | 405             |              |
| Exp. 2<br>5 MPa, 1 μm/s, 10 mm                     | 1349.461 | 32.934   | 45.238   | 2046.764 | 1580.961 | 71.135   | 23.918  | 2325.425 | 1615.777 | 10.648   | 27.190   | 308.191 | 0.437   | 446             |              |
|                                                    | 1347.885 | 56.789   | 46.727   | 3658.793 | 1581.804 | 61.262   | 28.141  | 2381.005 | 1615.657 | 18.684   | 25.578   | 508.712 | 0.559   | 392             |              |
|                                                    | 1349.581 | 27.255   | 45.084   | 1689.182 | 1580.771 | 59.941   | 23.287  | 1961.735 | 1615.657 | 8.663    | 28.679   | 264.463 | 0.431   | 449             |              |
|                                                    | 1348.884 | 28.684   | 45.431   | 1783.042 | 1581.286 | 49.591   | 26.027  | 1755.589 | 1616.565 | 9.347    | 26.125   | 259.937 | 0.469   | 432             |              |
|                                                    | 1348.142 | 37.237   | 44.497   | 2291.272 | 1580.555 | 57.112   | 25.962  | 1991.749 | 1615.280 | 11.303   | 24.933   | 299.885 | 0.500   | 419             |              |
|                                                    | 1348.807 | 23.669   | 44.914   | 1494.233 | 1579.763 | 68.421   | 21.618  | 2086.927 | 1613.987 | 7.899    | 31.936   | 261.813 | 0.389   | 468             |              |
|                                                    | 1349.395 | 25.256   | 44.220   | 1553.404 | 1581.013 | 59.884   | 22.800  | 1881.632 | 1615.294 | 7.522    | 26.787   | 214.488 | 0.426   | 452             |              |
|                                                    | 1349.637 | 17.206   | 45.143   | 1050.793 | 1581.209 | 49.624   | 24.571  | 1686.379 | 1616.910 | 4.896    | 25.679   | 133.832 | 0.366   | 478             |              |
|                                                    | 1349.604 | 17.706   | 44.891   | 1084.071 | 1580.812 | 53.312   | 24.291  | 1782.831 | 1616.347 | 5.199    | 26.141   | 144.674 | 0.360   | 481             |              |
|                                                    | 1349.212 | 12.395   | 46.133   | 796.425  | 1580.440 | 46.056   | 23.046  | 1489.073 | 1614.620 | 4.017    | 29.242   | 125.050 | 0.330   | 494             |              |
|                                                    | 1349.074 | 33.403   | 46.386   | 2113.413 | 1582.177 | 51.040   | 27.313  | 1869.115 | 1616.758 | 10.930   | 25.666   | 298.630 | 0.494   | 421             |              |
|                                                    |          |          |          |          |          |          |         |          |          |          |          |         |         | <b>Average:</b> | <b>0.438</b> |
|                                                    |          | 1347.990 | 48.859   | 48.164   | 3196.088 | 1581.285 | 65.015  | 27.760   | 2455.314 | 1614.771 | 17.583   | 27.092  | 507.064 | 0.519           | 410          |
|                                                    |          | 1347.769 | 50.987   | 46.297   | 3241.708 | 1580.871 | 66.973  | 27.706   | 2539.113 | 1614.988 | 16.975   | 26.544  | 479.638 | 0.518           | 411          |
|                                                    | 1348.355 | 45.263   | 46.196   | 2817.464 | 1580.916 | 69.422   | 26.843  | 2508.971 | 1614.820 | 14.812   | 27.679   | 436.421 | 0.489   | 423             |              |
|                                                    | 1348.206 | 62.537   | 46.738   | 4096.974 | 1582.204 | 66.709   | 29.360  | 2607.137 | 1616.117 | 21.367   | 25.664   | 583.699 | 0.562   | 391             |              |
|                                                    | 1347.392 | 54.206   | 46.687   | 3448.641 | 1580.212 | 75.965   | 27.349  | 2859.707 | 1614.453 |          |          |         |         |                 |              |

|                        |          |         |        |           |          |         |        |          |          |        |        |                 |              |     |
|------------------------|----------|---------|--------|-----------|----------|---------|--------|----------|----------|--------|--------|-----------------|--------------|-----|
|                        | 1348.382 | 56.368  | 44.077 | 3351.943  | 1580.353 | 112.666 | 24.879 | 3856.436 | 1615.455 | 17.688 | 26.721 | 503.113         | 0.435        | 448 |
|                        | 1348.177 | 60.655  | 44.623 | 3793.730  | 1580.586 | 104.039 | 23.755 | 3485.355 | 1615.028 | 17.874 | 27.315 | 519.699         | 0.486        | 425 |
|                        | 1348.696 | 31.462  | 44.898 | 1917.034  | 1580.367 | 93.395  | 22.104 | 2908.263 | 1614.524 | 10.076 | 28.239 | 302.893         | 0.374        | 475 |
|                        | 1348.153 | 44.475  | 45.142 | 2761.576  | 1580.370 | 79.273  | 25.237 | 2774.913 | 1615.086 | 13.887 | 27.403 | 405.076         | 0.465        | 434 |
|                        | 1348.737 | 42.742  | 43.713 | 2557.950  | 1580.206 | 96.760  | 23.053 | 3124.593 | 1615.171 | 13.102 | 27.588 | 384.770         | 0.422        | 453 |
|                        | 1348.436 | 25.894  | 45.498 | 1607.400  | 1579.242 | 78.863  | 21.778 | 2404.815 | 1612.433 | 9.161  | 31.793 | 310.032         | 0.372        | 476 |
|                        | 1348.410 | 46.960  | 46.254 | 3059.487  | 1581.379 | 68.216  | 26.154 | 2399.578 | 1615.435 | 16.139 | 26.575 | 456.530         | 0.517        | 411 |
|                        | 1348.577 | 31.182  | 44.547 | 1917.108  | 1580.181 | 70.302  | 24.317 | 2325.700 | 1614.158 | 9.367  | 27.779 | 276.978         | 0.424        | 452 |
|                        | 1349.172 | 24.434  | 43.909 | 1460.790  | 1580.185 | 67.190  | 22.098 | 2043.237 | 1613.167 | 7.302  | 29.214 | 227.069         | 0.392        | 467 |
| Exp. 5                 | 1348.997 | 18.036  | 46.866 | 1139.224  | 1580.153 | 65.742  | 21.589 | 1975.825 | 1612.758 | 5.986  | 29.858 | 190.247         | 0.345        | 488 |
| 5 MPa, 100 µm/s, 20 mm | 1348.314 | 52.252  | 47.073 | 3485.528  | 1582.535 | 58.886  | 29.621 | 2307.478 | 1616.324 | 17.631 | 25.144 | 471.886         | 0.556        | 393 |
|                        | 1348.944 | 34.495  | 47.523 | 2265.175  | 1580.838 | 72.999  | 23.927 | 2438.890 | 1614.416 | 12.175 | 28.292 | 366.654         | 0.447        | 442 |
|                        | 1349.145 | 35.244  | 46.118 | 2215.252  | 1581.276 | 66.155  | 26.388 | 2443.528 | 1616.217 | 11.385 | 27.445 | 332.597         | 0.444        | 444 |
|                        | 1348.127 | 64.957  | 48.241 | 4374.929  | 1582.777 | 68.143  | 30.384 | 2808.340 | 1616.297 | 23.274 | 26.654 | 660.333         | 0.558        | 393 |
|                        | 1348.854 | 31.294  | 46.706 | 1980.203  | 1580.509 | 67.100  | 24.004 | 2258.223 | 1614.345 | 10.654 | 29.693 | 336.753         | 0.433        | 448 |
|                        | 1347.944 | 37.723  | 46.484 | 2470.312  | 1580.729 | 54.045  | 26.200 | 2015.591 | 1614.263 | 12.767 | 29.693 | 406.417         | 0.505        | 416 |
|                        | 1348.545 | 22.182  | 45.610 | 1395.157  | 1579.932 | 54.867  | 24.043 | 1830.889 | 1614.410 | 7.398  | 29.082 | 229.002         | 0.404        | 461 |
|                        | 1348.394 | 39.856  | 46.798 | 2549.551  | 1580.365 | 62.433  | 25.928 | 2164.306 | 1614.303 | 14.049 | 27.866 | 416.718         | 0.497        | 420 |
|                        | 1347.564 | 59.528  | 47.080 | 3897.153  | 1581.295 | 69.275  | 28.928 | 2728.059 | 1615.139 | 20.364 | 26.429 | 572.904         | 0.541        | 400 |
|                        | 1349.119 | 37.308  | 44.325 | 2249.961  | 1581.393 | 63.482  | 26.666 | 2329.629 | 1616.899 | 11.515 | 25.613 | 313.950         | 0.460        | 436 |
|                        |          |         |        |           |          |         |        |          |          |        |        | <b>Average:</b> | <b>0.454</b> |     |
|                        | 1349.561 | 26.046  | 45.226 | 1532.798  | 1580.451 | 84.696  | 23.305 | 2733.772 | 1615.722 | 7.898  | 26.759 | 224.971         | 0.341        | 489 |
|                        | 1347.695 | 50.460  | 45.173 | 3162.915  | 1580.224 | 75.335  | 26.583 | 2780.154 | 1615.174 | 15.094 | 26.736 | 429.555         | 0.496        | 420 |
|                        | 1348.445 | 40.016  | 44.703 | 2520.636  | 1580.549 | 84.677  | 24.513 | 2876.010 | 1615.505 | 12.459 | 26.387 | 349.937         | 0.439        | 446 |
|                        | 1349.316 | 40.542  | 44.252 | 2419.097  | 1580.378 | 109.661 | 21.823 | 3404.033 | 1615.792 | 12.236 | 28.398 | 369.870         | 0.391        | 467 |
|                        | 1348.500 | 33.163  | 46.006 | 2111.090  | 1580.601 | 79.961  | 23.179 | 2630.080 | 1615.107 | 10.390 | 29.953 | 331.266         | 0.416        | 456 |
|                        | 1347.972 | 49.508  | 43.662 | 2963.988  | 1580.350 | 89.909  | 26.346 | 3215.382 | 1616.105 | 14.781 | 25.303 | 398.123         | 0.451        | 440 |
|                        | 1348.721 | 32.586  | 45.177 | 2016.727  | 1579.741 | 78.425  | 23.652 | 2581.064 | 1614.358 | 10.061 | 29.023 | 310.842         | 0.411        | 458 |
|                        | 1348.842 | 32.554  | 44.923 | 1974.918  | 1580.418 | 84.356  | 23.550 | 2754.721 | 1615.847 | 10.198 | 26.242 | 284.869         | 0.394        | 466 |
|                        | 1349.381 | 48.633  | 42.469 | 2823.517  | 1581.083 | 95.082  | 24.303 | 3154.869 | 1616.934 | 13.764 | 24.325 | 356.382         | 0.446        | 443 |
| Exp. 6                 | 1348.651 | 43.373  | 44.637 | 2710.997  | 1580.516 | 84.399  | 24.109 | 2865.123 | 1615.602 | 13.498 | 27.120 | 389.662         | 0.454        | 439 |
| 5 MPa, 100 µm/s, 10 mm | 1350.509 | 25.370  | 44.077 | 1440.231  | 1580.670 | 76.769  | 21.622 | 2355.425 | 1617.160 | 7.429  | 26.282 | 207.840         | 0.360        | 481 |
|                        | 1348.731 | 37.328  | 45.999 | 2423.180  | 1580.939 | 81.004  | 25.439 | 2842.380 | 1615.864 | 12.026 | 27.677 | 354.304         | 0.431        | 449 |
|                        | 1349.373 | 39.785  | 43.584 | 2361.649  | 1580.775 | 91.886  | 23.046 | 2954.563 | 1615.529 | 12.242 | 25.341 | 330.237         | 0.418        | 455 |
|                        | 1348.206 | 47.480  | 44.892 | 2993.650  | 1580.593 | 78.652  | 26.245 | 2866.238 | 1615.572 | 14.632 | 26.928 | 419.399         | 0.477        | 429 |
|                        | 1348.665 | 42.132  | 45.164 | 2679.456  | 1580.921 | 79.150  | 24.536 | 2696.432 | 1615.174 | 13.586 | 27.421 | 396.659         | 0.464        | 434 |
|                        | 1348.392 | 29.599  | 47.969 | 1919.670  | 1580.674 | 72.594  | 25.805 | 2610.328 | 1615.075 | 9.547  | 27.159 | 276.001         | 0.399        | 463 |
|                        | 1347.585 | 69.937  | 45.876 | 4536.655  | 1581.342 | 84.879  | 25.980 | 3071.036 | 1614.318 | 23.926 | 29.241 | 744.727         | 0.543        | 399 |
|                        | 1347.760 | 52.126  | 45.146 | 3289.897  | 1580.815 | 74.302  | 27.450 | 2807.212 | 1615.859 | 16.161 | 25.888 | 445.532         | 0.503        | 417 |
|                        | 1348.984 | 26.554  | 44.802 | 1604.011  | 1580.306 | 77.272  | 23.034 | 2506.574 | 1615.414 | 7.862  | 27.310 | 227.969         | 0.370        | 476 |
|                        | 1349.308 | 27.889  | 44.655 | 1677.597  | 1580.961 | 66.045  | 23.822 | 2201.999 | 1616.361 | 8.650  | 27.173 | 250.202         | 0.406        | 460 |
|                        |          |         |        |           |          |         |        |          |          |        |        | <b>Average:</b> | <b>0.430</b> |     |
|                        | 1348.517 | 48.548  | 48.958 | 3357.220  | 1582.418 | 62.205  | 29.492 | 2457.157 | 1616.421 | 19.449 | 26.589 | 550.464         | 0.527        | 406 |
|                        | 1348.438 | 73.400  | 49.123 | 5066.791  | 1583.006 | 78.859  | 29.385 | 3144.797 | 1616.200 | 28.508 | 26.590 | 818.808         | 0.561        | 391 |
|                        | 1349.284 | 34.626  | 46.443 | 2193.260  | 1581.366 | 73.793  | 24.776 | 2548.847 | 1615.289 | 12.568 | 28.856 | 386.029         | 0.428        | 451 |
|                        | 1348.677 | 59.254  | 47.480 | 3852.522  | 1581.964 | 80.184  | 27.812 | 3017.487 | 1615.948 | 21.098 | 26.718 | 600.049         | 0.516        | 412 |
|                        | 1349.141 | 51.363  | 47.116 | 3372.557  | 1582.243 | 82.636  | 27.298 | 3054.283 | 1616.840 | 18.653 | 26.967 | 535.431         | 0.484        | 425 |
|                        | 1348.623 | 50.052  | 47.517 | 3256.739  | 1581.861 | 67.231  | 28.263 | 2549.139 | 1616.202 | 18.411 | 26.465 | 518.636         | 0.515        | 412 |
|                        | 1348.609 | 53.306  | 48.293 | 3595.915  | 1581.645 | 76.690  | 27.908 | 2963.839 | 1615.960 | 18.763 | 27.347 | 546.184         | 0.506        | 414 |
|                        | 1349.815 | 22.141  | 46.008 | 1394.670  | 1580.521 | 72.806  | 23.597 | 2405.530 | 1615.075 | 7.447  | 30.096 | 238.579         | 0.345        | 487 |
|                        | 1349.347 | 32.457  | 46.552 | 2067.070  | 1581.230 | 79.186  | 24.026 | 2597.913 | 1614.857 | 11.986 | 28.882 | 368.481         | 0.411        | 458 |
| Exp. 8                 | 1347.093 | 86.801  | 50.523 | 6194.527  | 1582.357 | 81.963  | 31.666 | 3576.012 | 1615.012 | 31.750 | 26.376 | 905.330         | 0.580        | 383 |
| 25 MPa, 1 µm/s, 20 mm  | 1348.739 | 47.762  | 48.121 | 3200.406  | 1581.683 | 77.327  | 26.512 | 2801.776 | 1615.515 | 18.058 | 27.415 | 526.986         | 0.490        | 423 |
|                        | 1348.344 | 60.893  | 47.286 | 3960.078  | 1581.365 | 92.878  | 27.317 | 3461.557 | 1616.059 | 20.073 | 26.493 | 566.084         | 0.496        | 420 |
|                        | 1348.357 | 86.527  | 48.515 | 5888.116  | 1582.781 | 93.065  | 29.659 | 3732.933 | 1616.125 | 31.761 | 27.051 | 914.574         | 0.559        | 392 |
|                        | 1347.987 | 86.549  | 48.682 | 5916.158  | 1582.859 | 90.847  | 30.490 | 3746.349 | 1616.576 | 29.846 | 25.815 | 992.856         | 0.555        | 394 |
|                        | 1348.210 | 70.636  | 47.788 | 4769.277  | 1581.555 | 87.770  | 27.481 | 3283.043 | 1615.369 | 25.150 | 27.687 | 741.241         | 0.542        | 400 |
|                        | 1347.469 | 67.566  | 48.172 | 4584.501  | 1580.742 | 83.145  | 28.729 | 3265.207 | 1614.604 | 23.805 | 26.827 | 679.769         | 0.537        | 407 |
|                        | 1347.939 | 78.050  | 47.944 | 5309.795  | 1582.073 | 86.312  | 29.359 | 3466.005 | 1615.663 | 26.365 | 26.467 | 742.788         | 0.558        | 393 |
|                        | 1347.748 | 88.175  | 48.743 | 6161.381  | 1582.281 | 93.994  | 29.257 | 3750.590 | 1615.062 | 33.277 | 28.397 | 1008.400        | 0.564        | 390 |
|                        | 1347.617 | 105.105 | 50.048 | 7491.024  | 1583.721 | 92.086  | 31.834 | 3999.433 | 1615.737 | 40.113 | 26.577 | 1189.871        | 0.591        | 378 |
|                        | 1342.118 | 145.250 | 52.520 | 10791.415 | 1578.010 | 96.092  | 36.503 | 4760.146 | 1608.927 | 45.759 | 26.618 | 1524.960        | 0.632        | 360 |
|                        |          |         |        |           |          |         |        |          |          |        |        | <b>Average:</b> | <b>0.520</b> |     |
|                        | 1347.677 | 51.005  | 48.383 | 3460.972  | 1581.245 | 62.695  | 27.664 | 2416.065 | 1614.574 | 18.467 | 29.001 | 582.529         | 0.536        | 403 |
|                        | 1346.647 | 67.759  | 48.677 | 4592.010  | 1581.062 | 69.075  | 29.618 | 2772.398 | 1614.205 | 23.814 | 27.417 | 697.198         | 0.570        | 388 |
|                        | 1346.450 | 100.624 | 47.857 | 6857.426  | 1583.308 | 75.269  | 32.582 | 3316.501 | 1615.248 | 32.418 | 26.311 | 945.908         | 0.617        | 367 |
|                        | 1348.099 | 47.032  | 47.321 | 3103.483  | 1581.367 | 68.558  | 28.887 | 2614.781 | 1615.592 | 16.147 | 25.584 | 439.748         | 0.504        | 417 |
|                        | 1346.819 | 83.416  | 48.778 | 5740.682  | 1582.274 | 71.281  | 30.510 | 2953.581 | 1614.564 | 28.142 | 27.479 | 824.673         | 0.603        | 373 |
|                        | 1346.522 | 61.567  | 48.774 | 4194.478  | 1580.564 | 65.275  | 29.660 | 2588.051 | 1613.892 | 21.800 | 27.766 | 644.328         | 0.565        | 390 |
|                        | 1346.551 | 93.739  | 48.474 | 6475.176  | 1583.235 | 69.903  | 32.197 | 3029.417 | 1614.962 | 30.236 | 26.651 | 857.759         | 0.625        | 363 |
|                        | 1347.195 | 81.286  | 46.461 | 5418.888  | 1582.420 | 69.816  | 29.841 | 2855.476 | 1614.835 | 26.856 | 27.886 | 797.165         | 0.597        | 375 |
|                        | 1346.422 | 71.828  | 47.724 | 4845.266  | 1585.946 | 40.546  | 36.840 | 2012.440 | 1616.000 | 20.504 | 23.883 | 521.260         | 0.657        | 349 |
| Exp.9                  | 1347.068 | 80.292  | 48.071 | 5455.110  | 1582.252 | 71.305  | 31.458 | 3029.137 | 1615.184 | 26.234 | 26.705 | 745.745         | 0.591        | 378 |
| 25 MPa, 10 µm/s, 20 mm | 1347.003 | 95.404  | 49.105 | 6540.182  | 1583.309 | 74.671  | 33.407 | 3408.736 | 1615.398 | 3      |        |                 |              |     |

**Exp. 10**  
**25 MPa, 100 µm/s, 20 mm**

|          |         |        |          |          |        |        |          |          |        |        |          |       |     |
|----------|---------|--------|----------|----------|--------|--------|----------|----------|--------|--------|----------|-------|-----|
| 1346.416 | 87.280  | 48.567 | 6022.858 | 1582.338 | 77.035 | 30.120 | 3281.878 | 1614.218 | 28.982 | 28.203 | 933.126  | 0.588 | 379 |
| 1344.369 | 136.458 | 50.028 | 9729.084 | 1582.832 | 82.451 | 35.774 | 4053.746 | 1613.176 | 40.836 | 26.516 | 1240.343 | 0.648 | 353 |
| 1346.860 | 95.698  | 48.070 | 6543.283 | 1585.123 | 61.933 | 35.227 | 2890.080 | 1616.499 | 31.126 | 26.549 | 927.636  | 0.632 | 360 |
| 1346.393 | 107.967 | 48.315 | 7481.001 | 1583.963 | 74.614 | 33.704 | 3410.463 | 1615.509 | 34.052 | 26.832 | 993.077  | 0.629 | 361 |
| 1347.549 | 64.526  | 47.397 | 4404.875 | 1582.320 | 70.359 | 26.502 | 2579.233 | 1614.805 | 22.859 | 29.204 | 710.609  | 0.572 | 386 |
| 1347.163 | 48.247  | 47.439 | 3232.902 | 1580.766 | 58.758 | 24.944 | 2068.914 | 1612.736 | 17.630 | 32.549 | 610.838  | 0.547 | 398 |
| 1347.152 | 62.336  | 47.704 | 4248.241 | 1582.271 | 57.064 | 30.582 | 2405.957 | 1615.123 | 20.249 | 28.311 | 615.616  | 0.584 | 381 |
| 1346.214 | 102.141 | 48.641 | 7101.432 | 1583.623 | 73.311 | 33.992 | 3340.020 | 1615.346 | 31.999 | 26.285 | 900.742  | 0.626 | 362 |
| 1347.001 | 98.877  | 47.538 | 6694.393 | 1584.084 | 68.899 | 34.338 | 3176.860 | 1616.075 | 32.007 | 26.478 | 970.272  | 0.617 | 366 |
| 1346.681 | 100.844 | 48.630 | 7027.648 | 1585.086 | 66.653 | 35.945 | 3118.627 | 1616.638 | 31.504 | 25.538 | 922.354  | 0.635 | 358 |
| 1346.821 | 57.464  | 48.354 | 3928.364 | 1581.786 | 52.146 | 31.157 | 2203.032 | 1614.911 | 19.295 | 26.838 | 551.223  | 0.588 | 379 |
| 1347.528 | 40.484  | 47.236 | 2694.067 | 1580.812 | 60.427 | 26.132 | 2214.268 | 1613.948 | 14.290 | 29.680 | 451.472  | 0.503 | 417 |
| 1346.423 | 88.895  | 48.370 | 6176.757 | 1582.785 | 67.719 | 32.089 | 2962.873 | 1614.705 | 29.124 | 28.536 | 892.306  | 0.616 | 367 |
| 1346.985 | 67.912  | 48.770 | 4650.757 | 1582.673 | 57.514 | 31.503 | 2439.436 | 1615.278 | 24.238 | 26.775 | 743.381  | 0.594 | 377 |
| 1346.962 | 71.784  | 47.843 | 4896.750 | 1582.981 | 60.997 | 30.547 | 2462.994 | 1615.240 | 23.402 | 26.510 | 660.381  | 0.611 | 369 |
| 1347.175 | 64.889  | 48.623 | 4462.913 | 1583.600 | 53.537 | 32.899 | 2384.042 | 1616.198 | 22.198 | 25.994 | 676.758  | 0.593 | 377 |
| 1345.766 | 92.424  | 47.911 | 6341.542 | 1584.149 | 57.601 | 36.250 | 2741.965 | 1615.434 | 27.535 | 25.508 | 811.943  | 0.641 | 356 |
| 1346.484 | 69.216  | 48.208 | 4741.802 | 1582.379 | 55.613 | 32.836 | 2410.036 | 1615.040 | 23.277 | 27.509 | 681.603  | 0.605 | 372 |
| 1345.204 | 121.467 | 48.579 | 8473.319 | 1584.574 | 70.214 | 36.932 | 3436.877 | 1614.799 | 33.962 | 24.967 | 902.579  | 0.661 | 347 |
| 1346.703 | 48.346  | 49.075 | 3319.275 | 1581.708 | 44.196 | 31.230 | 1873.653 | 1614.310 | 17.053 | 27.539 | 499.894  | 0.583 | 382 |

**Average: 0.604**
